# Supplementary material
Source: MDPI journal article supplement (https://www.mdpi.com/2077-1312/8/8/585)
Supplement: s1 [file s1]

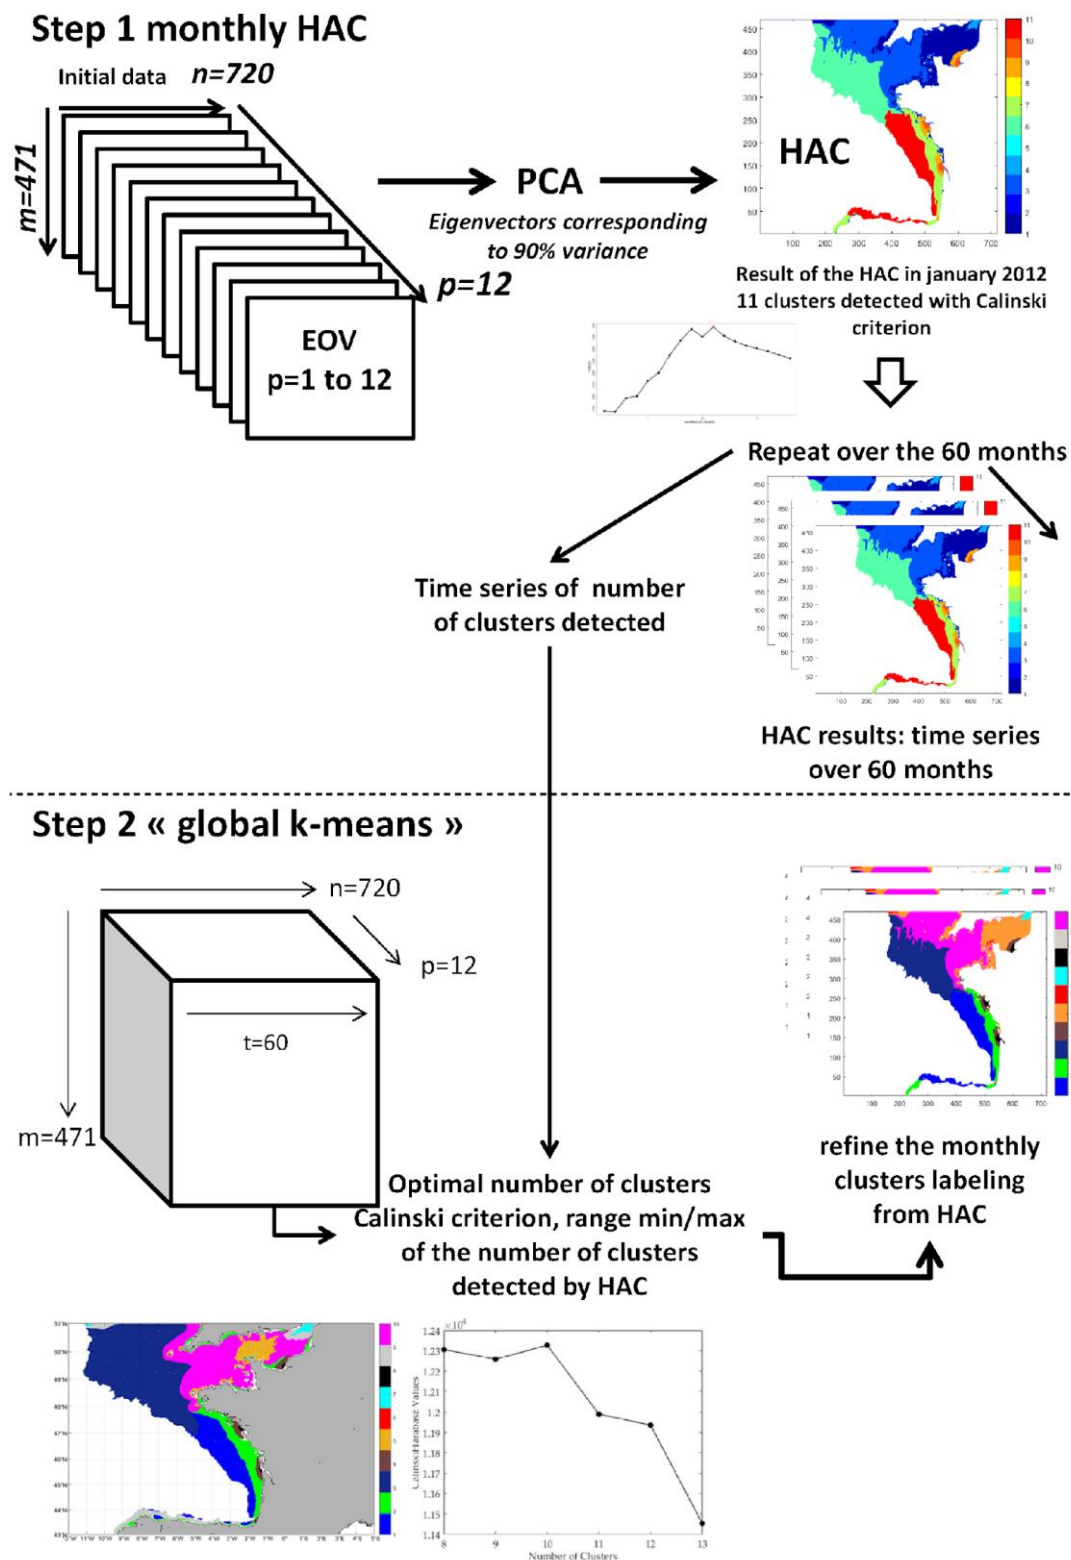

**FigureS1.** Pipeline of the methodology of the hybrid two steps clustering

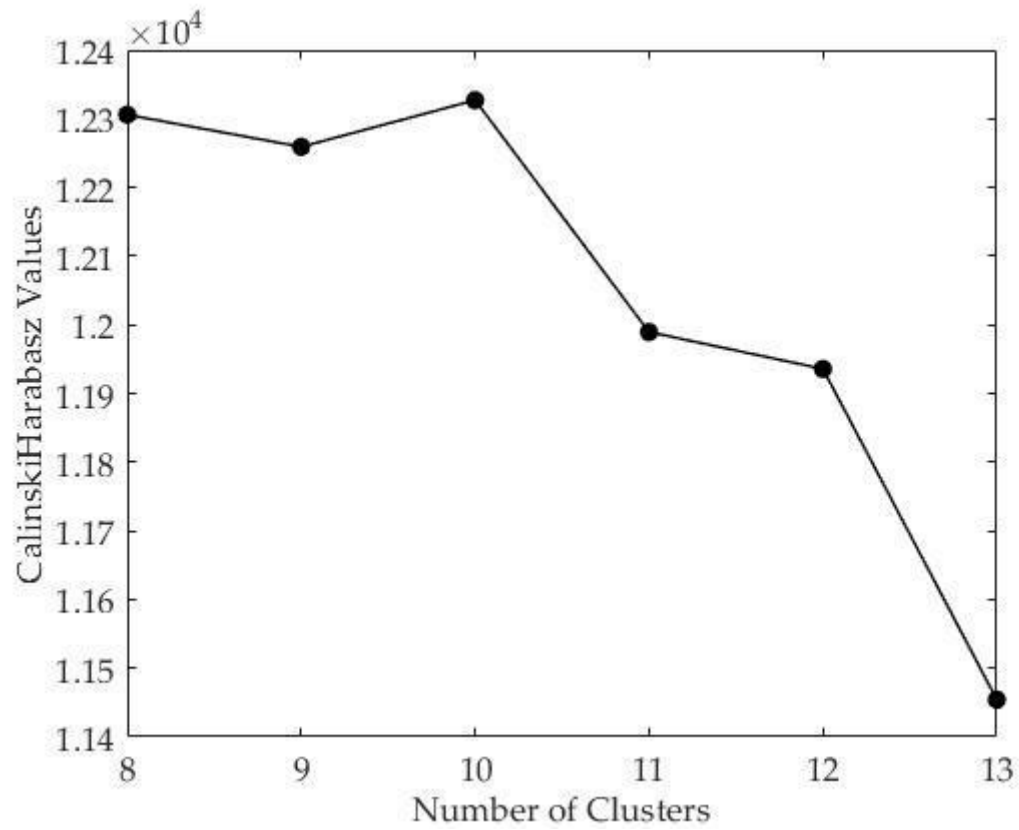

**Figure S2.** Evaluation of the optimal number of clusters for the global k-means using the Calinski-Harabasz clustering evaluation criterion, within a range of  $k$  potential clusters between the minimum (8) and maximum (13) number of clusters detected by AHC.

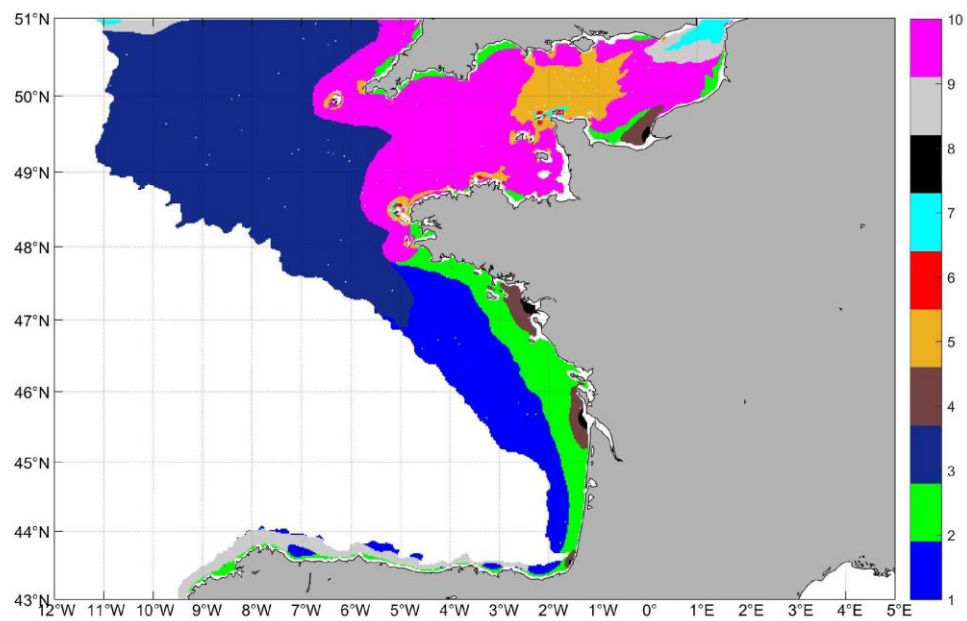

**Figure S3.** Global k-means results on the whole data set, with an initialization with 10 clusters

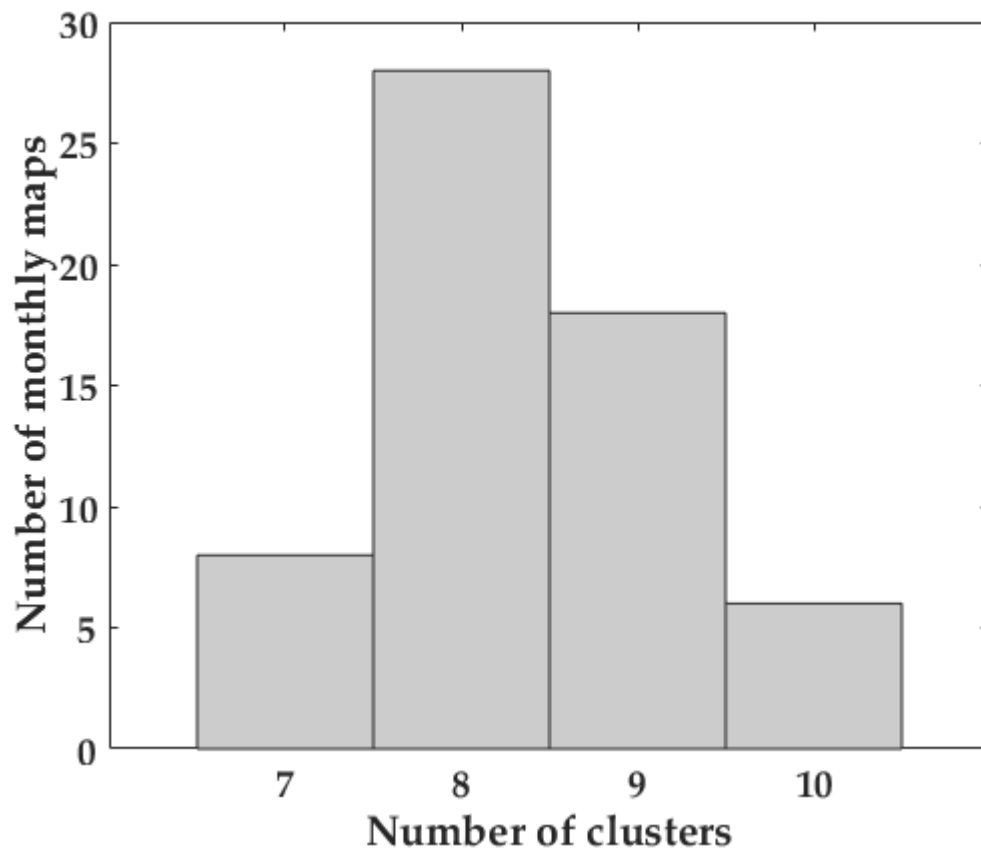

Figure S4. Distribution of the number of clusters after the second-step procedure.

Table S1. Performance and evaluation metrics for the GBM model. **ntrees** represents the optimal number of total number of boosting trees to fit using k-fold cross validation. **RMSE** is calculated between predicted values and initial data.

| metrics       | Patch 1 | Patch 2 | Patch 3 | Patch 4 | Patch 5 | Patch 6 | Patch 7 | Patch 8 | Patch 9 | Patch 10 |
|---------------|---------|---------|---------|---------|---------|---------|---------|---------|---------|----------|
| <b>ntrees</b> | 2800    | 5150    | 2199    | 5250    | 4250    | 2455    | 2799    | 1846    | 3650    | 5700     |
| <b>RMSE</b>   | 0,12    | 0,19    | 0,09    | 0,18    | 0,17    | 0,42    | 0,17    | 0,11    | 0,23    | 0,18     |
